# Supplementary material
Source: PubMed Central journal article supplement (PMC8845026)
Supplement: jamaneurol-e215487-s002.pdf [file jamaneurol-e215487-s002.pdf]

\*Indicates required information. Only first name, last name, and suffix will appear in PubMed.

| <b>*Group Name(s): The MONEAD Study Group</b> |                   |                              |                  |                                         |                                          |                                                         |                                                                                            |
|-----------------------------------------------|-------------------|------------------------------|------------------|-----------------------------------------|------------------------------------------|---------------------------------------------------------|--------------------------------------------------------------------------------------------|
| <b>*First Name and Middle Initial(s)</b>      | <b>*Last Name</b> | <b>*Suffix (eg, Jr, III)</b> | Academic Degrees | Institution                             | Location (city, state/province, country) | Role or Contribution, eg, chair, principal investigator | Group (if more than 1 Group listed in the byline) and/or Subgroup (eg, Steering Committee) |
| Morris                                        | Cohen             |                              | PhD              | Pediatric Neuropsychology International | Augusta, GA                              | Director of Neuropsychology Core                        | Executive Committee                                                                        |
| Maurice                                       | Druzin            |                              | MD               | Stanford University                     | Stanford, CA                             | Co-Director of OB Core                                  | Executive Committee                                                                        |
| Richard                                       | Finnell           |                              | PhD              | Baylor College of Medicine              | Houston, TX                              | Consultant on Teratogenicity                            | Executive Committee                                                                        |
| Gregory                                       | Holmes            |                              | MD               | University of Vermont                   | Burlington, VT                           | Consultant and Executive Committee Member               | Executive Committee                                                                        |
| Lorene                                        | Nelson            |                              | PhD              | Stanford University                     | Stanford, CA                             | Consultant and Executive Committee Member               | Executive Committee                                                                        |
| Zachary                                       | Stowe             |                              | MD               | University of Wisconsin                 | Madison, WI                              | Director of Psychiatric Core                            | Executive Committee                                                                        |
| Linda                                         | Van Marter        |                              | MD               | Brigham & Women's Hospital              | Boston, MA                               | Director of Neonatal Core                               | Executive Committee                                                                        |
| Peter                                         | Wells             |                              | PharmD           | University of Toronto                   | Toronto, ON, Canada                      | Consultant and Executive Committee Member               | Executive Committee                                                                        |
| Mark                                          | Yerby             |                              | MD               | Oregon Health Sciences University       | Portland, OR                             | Consultant and Executive Committee Member               | Executive Committee                                                                        |
| Eugene                                        | Moore             |                              | BS               | Emory University                        | Atlanta, GA                              | Multisite Research Project Manager                      | Executive Committee                                                                        |
| Ryan                                          | May               |                              | PhD              | The Emmes Company                       | Rockville, MD                            | Former Multi-PI                                         | Executive Committee (former)                                                               |

## Supplemental Online Content: Nonauthor Collaborators

\*Indicates required information. Only first name, last name, and suffix will appear in PubMed.

| *First Name and Middle Initial(s) | *Last Name   | *Suffix (eg, Jr, III) | Academic Degrees | Institution         | Location (city, state/province, country) | Role or Contribution, eg, chair, principal investigator | Group (if more than 1 Group listed in the byline) and/or Subgroup (eg, Steering Committee) |
|-----------------------------------|--------------|-----------------------|------------------|---------------------|------------------------------------------|---------------------------------------------------------|--------------------------------------------------------------------------------------------|
| Dominic                           | Ippolito     |                       | MS               | The Emmes Company   | Rockville, MD                            | Project Manager                                         |                                                                                            |
| Carrie                            | Brown        |                       | MS               | The Emmes Company   | Rockville, MD                            | Project Biostatistician                                 |                                                                                            |
| Chelsea                           | Robalino     |                       | MS               | The Emmes Company   | Rockville, MD                            | Project Biostatistician                                 |                                                                                            |
| Julia                             | Skinner      |                       | Mstat            | The Emmes Company   | Rockville, MD                            | SAS Programmer                                          |                                                                                            |
| Lisa                              | Davis        |                       | BA               | The Emmes Company   | Rockville, MD                            | Administrative Coordinator                              |                                                                                            |
| Nilay                             | Shah         |                       | MD               | The Emmes Company   | Rockville, MD                            | Medical Monitor                                         |                                                                                            |
| Brenda                            | Leung        |                       | BS               | The Emmes Company   | Rockville, MD                            | Programmer Analyst                                      |                                                                                            |
| Mark                              | Friedman     |                       | MS               | The Emmes Company   | Rockville, MD                            | Clinical Systems Analyst                                |                                                                                            |
| Hayley                            | Loblein      |                       | PhD              | The Emmes Company   | Rockville, MD                            | Data Manager/Protocol Monitor                           |                                                                                            |
| Traci                             | Sheer        |                       | BA               | The Emmes Company   | Rockville, MD                            | Data Manager/Protocol Monitor                           |                                                                                            |
| Suzanne                           | Strickland   |                       | MD               | Augusta University  | Augusta, GA                              | Site PI                                                 |                                                                                            |
| Erin                              | Latif        |                       | MD               | Augusta University  | Augusta, GA                              | OB co-Investigator                                      |                                                                                            |
| Yong                              | Park         |                       | MD               | Augusta University  | Augusta, GA                              | OB co-Investigator                                      |                                                                                            |
| Delmaris                          | Acosta-Cotte |                       | MA               | Augusta University  | Augusta, GA                              | Site Neuropsychologist                                  |                                                                                            |
| Patty                             | Ray          |                       | PhD              | Augusta University  | Augusta, GA                              | Research Assistant                                      |                                                                                            |
| Alison                            | Pack         |                       | MD               | Columbia University | New York, NY                             | Site PI                                                 |                                                                                            |
| Kirsten                           | Cleary       |                       | MD               | Columbia University | New York, NY                             | OB co-Investigator                                      |                                                                                            |

## Supplemental Online Content: Nonauthor Collaborators

\*Indicates required information. Only first name, last name, and suffix will appear in PubMed.

| *First Name and Middle Initial(s) | *Last Name | *Suffix (eg, Jr, III) | Academic Degrees | Institution                                       | Location (city, state/province, country) | Role or Contribution, eg, chair, principal investigator | Group (if more than 1 Group listed in the byline) and/or Subgroup (eg, Steering Committee) |
|-----------------------------------|------------|-----------------------|------------------|---------------------------------------------------|------------------------------------------|---------------------------------------------------------|--------------------------------------------------------------------------------------------|
| Joyce                             | Echo       |                       | PhD              | Columbia University                               | New York, NY                             | Site Neuropsychologist                                  |                                                                                            |
| Annette                           | Zygmunt    |                       | PhD              | Columbia University                               | New York, NY                             | Site Neuropsychologist                                  |                                                                                            |
| Camilla                           | Casadei    |                       | BA               | Columbia University                               | New York, NY                             | Research Assistant                                      |                                                                                            |
| Evan                              | Gedzelman  |                       | MD               | Emory University                                  | Atlanta, GA                              | Site PI                                                 |                                                                                            |
| Mary                              | Dolan      |                       | MD               | Emory University                                  | Atlanta, GA                              | OB co-Investigator                                      |                                                                                            |
| Kim                               | Ono        |                       | PhD              | Emory University Children's Healthcare of Atlanta | Atlanta, GA                              | Site Neuropsychologist                                  |                                                                                            |
| Donald                            | Bearden    |                       | PhD              | Emory University Children's Healthcare of Atlanta | Atlanta, GA                              | Site Neuropsychologist                                  |                                                                                            |
| Christine                         | Ghilian    |                       | PhD              | Emory University Children's Healthcare of Atlanta | Atlanta, GA                              | Site Neuropsychologist                                  |                                                                                            |
| Diane                             | Teagarden  |                       | MSN              | Emory University                                  | Atlanta, GA                              | Co-Investigator                                         |                                                                                            |
| Melanee                           | Newman     |                       | RN               | Emory University                                  | Atlanta, GA                              | Research Assistant                                      |                                                                                            |
| Paul                              | McCabe     |                       | MD               | Geisinger Clinic                                  | Danville, PA                             | Site PI                                                 |                                                                                            |
| Michael                           | Paglia     |                       | MD               | Geisinger Clinic                                  | Danville, PA                             | OB co-Investigator                                      |                                                                                            |
| Cora                              | Taylor     |                       | PhD              | Geisinger Clinic                                  | Danville, PA                             | Site Neuropsychologist                                  |                                                                                            |
| Rosemarie                         | Delucca    |                       | RN               | Geisinger Clinic                                  | Danville, PA                             | Research Assistant                                      |                                                                                            |
| Kristina                          | Blessing   |                       | MSW              | Geisinger Clinic                                  | Danville, PA                             | Research Assistant                                      |                                                                                            |
| Paula Emanuela                    | Voinescu   |                       | MD               | Brigham & Women's Hospital                        | Boston, MA                               | Site PI                                                 |                                                                                            |
| Katrina                           | Boyer      |                       | PhD              | Boston Children's Hospital                        | Boston, MA                               | Site Neuropsychologist                                  |                                                                                            |

## Supplemental Online Content: Nonauthor Collaborators

\*Indicates required information. Only first name, last name, and suffix will appear in PubMed.

| *First Name and Middle Initial(s) | *Last Name      | *Suffix (eg, Jr, III) | Academic Degrees | Institution                | Location (city, state/province, country) | Role or Contribution, eg, chair, principal investigator | Group (if more than 1 Group listed in the byline) and/or Subgroup (eg, Steering Committee) |
|-----------------------------------|-----------------|-----------------------|------------------|----------------------------|------------------------------------------|---------------------------------------------------------|--------------------------------------------------------------------------------------------|
| Ellen                             | Hanson          |                       | PhD              | Boston Children's Hospital | Boston,MA                                | Site Neuropsychologist                                  |                                                                                            |
| Amy                               | Young           |                       | PsyD             | Boston Children's Hospital | Boston,MA                                | Site Neuropsychologist                                  |                                                                                            |
| Paige                             | Hickey          |                       | BS               | Boston Children's Hospital | Boston,MA                                | Site Psychometrist                                      |                                                                                            |
| Jolie                             | Strauss         |                       | MA               | Boston Children's Hospital | Boston,MA                                | Site Psychometrist                                      |                                                                                            |
| Hayley                            | Madeiras        |                       | BS               | Boston Children's Hospital | Boston,MA                                | Site Psychometrist                                      |                                                                                            |
| Li                                | Chen            |                       | BA               | Brigham & Women's Hospital | Boston,MA                                | Research Assistant                                      |                                                                                            |
| Stephanie                         | Allien          |                       | PAC              | Brigham & Women's Hospital | Boston,MA                                | Research Physician's Assistant                          |                                                                                            |
| Yvonne                            | Sheldon         |                       | RN               | Brigham & Women's Hospital | Boston,MA                                | Neonatal Research Nurse                                 |                                                                                            |
| Taylor                            | Weinau          |                       | BS               | Brigham & Women's Hospital | Boston,MA                                | OB Research Assistant                                   |                                                                                            |
| Gregory L                         | Barkley         |                       | MD               | Henry Ford Hospital        | Detroit, MI                              | Site PI                                                 |                                                                                            |
| Marianna                          | Spanaki-Varelas |                       | MD               | Henry Ford Hospital        | Detroit, MI                              | OB Co-Investigator                                      |                                                                                            |
| Andrea                            | Thomas          |                       | MS               | Henry Ford Hospital        | Detroit, MI                              | Site Neuropsychologist                                  |                                                                                            |
| Jules                             | Constantinou    |                       | MD               | Henry Ford Hospital        | Detroit, MI                              | Co-Investigator                                         |                                                                                            |
| Nazin                             | Mahmood         |                       | MD               | Henry Ford Hospital        | Detroit, MI                              | Co-Investigator                                         |                                                                                            |
| Vibhangini                        | Wasade          |                       | MD               | Henry Ford Hospital        | Detroit, MI                              | Co-Investigator                                         |                                                                                            |
| Shailaja                          | Gaddam          |                       | MD               | Henry Ford Hospital        | Detroit, MI                              | Co-Investigator                                         |                                                                                            |
| Andrew                            | Zillgitt        |                       | DO               | Henry Ford Hospital        | Detroit, MI                              | Co-Investigator                                         |                                                                                            |
| Taimur                            | Anwar           |                       | MD               | Henry Ford Hospital        | Detroit, MI                              | OB Co-Investigator                                      |                                                                                            |

## Supplemental Online Content: Nonauthor Collaborators

\*Indicates required information. Only first name, last name, and suffix will appear in PubMed.

| *First Name and Middle Initial(s) | *Last Name  | *Suffix (eg, Jr, III) | Academic Degrees | Institution              | Location (city, state/province, country) | Role or Contribution, eg, chair, principal investigator | Group (if more than 1 Group listed in the byline) and/or Subgroup (eg, Steering Committee) |
|-----------------------------------|-------------|-----------------------|------------------|--------------------------|------------------------------------------|---------------------------------------------------------|--------------------------------------------------------------------------------------------|
| Carla                             | Sandles     |                       | CCRP             | Henry Ford Hospital      | Detroit, MI                              | Research Assistant                                      |                                                                                            |
| Theresa                           | Holmes      |                       | BA               | Henry Ford Hospital      | Detroit, MI                              | Research Assistant                                      |                                                                                            |
| Emily                             | Johnson     |                       | MD               | Johns Hopkins University | Baltimore, MD                            | Site PI                                                 |                                                                                            |
| Gregory                           | Krauss      |                       | MD               | Johns Hopkins University | Baltimore, MD                            | f]Former Site PI                                        |                                                                                            |
| Shari                             | Lawson      |                       | MD               | Johns Hopkins University | Baltimore, MD                            | OB Co-Investigator                                      |                                                                                            |
| Alison                            | Pritchard   |                       | PhD              | John Hopkins University  | Baltimore, MD                            | Site Neuropsychologist                                  |                                                                                            |
| Matthew                           | Ryan        |                       | MS               | John Hopkins University  | Baltimore, MD                            | Site Neuropsychologist                                  |                                                                                            |
| Pam                               | Coe         |                       | MS               | John Hopkins University  | Baltimore, MD                            | Research Assistant                                      |                                                                                            |
| Julie                             | Hanna       |                       | MD               | Minnesota Epilepsy Group | Minneapolis, MN                          | Site PI                                                 |                                                                                            |
| Katie                             | Reger       |                       | PhD              | Minnesota Epilepsy Group | Minneapolis, MN                          | Site Neuropsychologist                                  |                                                                                            |
| Jenny                             | Pohlman     |                       | MBS              | Minnesota Epilepsy Group | Minneapolis, MN                          | Research Assistant                                      |                                                                                            |
| Alisha                            | Olson       |                       | RN               | Minnesota Epilepsy Group | Minneapolis, MN                          | Research Assistant                                      |                                                                                            |
| Jacqueline                        | French      |                       | MD               | New York University      | New York, NY                             | Site PI, Co-Director of Semiology Core                  | Executive Committee                                                                        |
| William                           | Schweizer   |                       | MD               | New York University      | New York, NY                             | OB Co-Investigator                                      |                                                                                            |
| Chris                             | Morrison    |                       | PhD              | New York University      | New York, NY                             | Site Neuropsychologist                                  |                                                                                            |
| William                           | MacAllister |                       | PhD              | New York University      | New York, NY                             | Site Neuropsychologist                                  |                                                                                            |
| Tobi                              | Clements    |                       | BA               | New York University      | New York, NY                             | Research Assistant                                      |                                                                                            |

## Supplemental Online Content: Nonauthor Collaborators

\*Indicates required information. Only first name, last name, and suffix will appear in PubMed.

| *First Name and Middle Initial(s) | *Last Name | *Suffix (eg, Jr, III) | Academic Degrees | Institution                         | Location (city, state/province, country) | Role or Contribution, eg, chair, principal investigator | Group (if more than 1 Group listed in the byline) and/or Subgroup (eg, Steering Committee) |
|-----------------------------------|------------|-----------------------|------------------|-------------------------------------|------------------------------------------|---------------------------------------------------------|--------------------------------------------------------------------------------------------|
| Sean                              | Hwang      |                       | MD               | Northwell Health                    | Great Neck, NY                           | Site PI                                                 |                                                                                            |
| Hima Bindu                        | Tam        |                       | MD               | Northwell Health                    | Great Neck, NY                           | OB Co-Investigator                                      |                                                                                            |
| Yael                              | Cukier     |                       | PhD              | Northwell Health                    | Great Neck, NY                           | Site Neuropsychologist                                  |                                                                                            |
| Erica                             | Meltzer    |                       | MD               | Northwell Health                    | Great Neck, NY                           | Site Neuropsychologist                                  |                                                                                            |
| Jacqueline                        | Helcer     |                       | PhD              | Northwell Health                    | Great Neck, NY                           | Site Neuropsychologist                                  |                                                                                            |
| Connie                            | Lau        |                       | MS               | Northwell Health                    | Great Neck, NY                           | Research Assistant                                      |                                                                                            |
| William                           | Grobman    |                       | MD               | Northwestern University             | Chicago, IL                              | OB Co-Investigator                                      |                                                                                            |
| Joseph                            | Coda       |                       | PsyD             | Northwestern University             | Chicago, IL                              | Site Neuropsychologist                                  |                                                                                            |
| Emily                             | Miller     |                       | MD               | Northwestern University             | Chicago, IL                              | OB Co-Investigator                                      |                                                                                            |
| Irena                             | Bellinski  |                       | RN               | Northwestern University             | Chicago, IL                              | Research Assistant                                      |                                                                                            |
| Elizabeth                         | Bachman    |                       | MPH              | Northwestern University             | Chicago, IL                              | Research Assistant                                      |                                                                                            |
| Casey                             | Krueger    |                       | PhD              | Stanford Healthcare                 | Stanford, CA                             | Site Neuropsychologist                                  |                                                                                            |
| Jordan                            | Seliger    |                       | MA               | Stanford University                 | Stanford, CA                             | Research Assistant                                      |                                                                                            |
| Jennifer                          | DeWolfe    |                       | DO               | University of Alabama at Birmingham | Birmingham, AL                           | Site PI                                                 |                                                                                            |
| John                              | Owen       |                       | MD               | University of Alabama at Birmingham | Birmingham, AL                           | OB Co-Investigator                                      |                                                                                            |
| Matthew                           | Thompson   |                       | PsyD             | University of Alabama at Birmingham | Birmingham, AL                           | Site Neuropsychologist                                  |                                                                                            |

## Supplemental Online Content: Nonauthor Collaborators

\*Indicates required information. Only first name, last name, and suffix will appear in PubMed.

| *First Name and Middle Initial(s) | *Last Name     | *Suffix (eg, Jr, III) | Academic Degrees | Institution                         | Location (city, state/province, country) | Role or Contribution, eg, chair, principal investigator | Group (if more than 1 Group listed in the byline) and/or Subgroup (eg, Steering Committee) |
|-----------------------------------|----------------|-----------------------|------------------|-------------------------------------|------------------------------------------|---------------------------------------------------------|--------------------------------------------------------------------------------------------|
| Cheryl                            | Hall           |                       | LPN              | University of Alabama at Birmingham | Birmingham, AL                           | Research Assistant                                      |                                                                                            |
| David                             | Labiner        |                       | MD               | University of Arizona               | Tucson, AZ                               | Site PI                                                 |                                                                                            |
| James                             | Maciulla       |                       | MD               | University of Arizona               | Tucson, AZ                               | OB Co-Investigator                                      |                                                                                            |
| Jennifer                          | Moon           |                       | PsyD             | University of Arizona               | Tucson, AZ                               | Site Neuropsychologist                                  |                                                                                            |
| Kayla                             | Darris         |                       | BA               | University of Arizona               | Tucson, AZ                               | Research Assistant                                      |                                                                                            |
| Jannifer                          | Cavitt         |                       | MD               | University of Cincinnati            | Cincinnati, OH                           | Site PI                                                 |                                                                                            |
| Michael                           | Privitera      |                       | MD               | University of Cincinnati            | Cincinnati, OH                           | Co-Investigator                                         |                                                                                            |
| Kellie                            | Flood-Schaffer |                       | MD               | University of Cincinnati            | Cincinnati, OH                           | OB Co-Investigator                                      |                                                                                            |
| George                            | Jewell         |                       | PhD              | University of Cincinnati            | Cincinnati, OH                           | Site Neuropsychologist                                  |                                                                                            |
| Lucy                              | Mendoza        |                       | CCRP             | University of Cincinnati            | Cincinnati, OH                           | Research Assistant                                      |                                                                                            |
| Enrique                           | Serrano        |                       | MD               | University of Miami                 | Miami, FL                                | Site PI                                                 |                                                                                            |
| Yasin                             | Salih          |                       | MD               | University of Miami                 | Miami, FL                                | OB Co-Investigator                                      |                                                                                            |
| Christin                          | Bermudez       |                       | PhD              | University of Miami                 | Miami, FL                                | Site Neuropsychologist                                  |                                                                                            |
| Michelle                          | Miranda        |                       | PhD              | University of Miami                 | Miami, FL                                | Site Neuropsychologist                                  |                                                                                            |
| Naymee                            | Velez-Ruiz     |                       | MD               | University of Miami                 | Miami, FL                                | Co-Investigator                                         |                                                                                            |
| Pedro                             | Figueredo      |                       | MD               | University of Miami                 | Miami, FL                                | Research Assistant                                      |                                                                                            |
| Anto                              | Bagic          |                       | MD               | University of Pittsburgh            | Pittsburgh, PA                           | Site PI                                                 |                                                                                            |
| Alexandra                         | Urban          |                       | MD               | University of Pittsburgh            | Pittsburgh, PA                           | Co-Investigator                                         |                                                                                            |
| Satya                             | Gedela         |                       | MD               | University of Pittsburgh            | Pittsburgh, PA                           | Co-Investigator                                         |                                                                                            |
| Christina                         | Patterson      |                       | MD               | University of Pittsburgh            | Pittsburgh, PA                           | Co-Investigator                                         |                                                                                            |

## Supplemental Online Content: Nonauthor Collaborators

\*Indicates required information. Only first name, last name, and suffix will appear in PubMed.

| *First Name and Middle Initial(s) | *Last Name     | *Suffix (eg, Jr, III) | Academic Degrees | Institution                            | Location (city, state/province, country) | Role or Contribution, eg, chair, principal investigator | Group (if more than 1 Group listed in the byline) and/or Subgroup (eg, Steering Committee) |
|-----------------------------------|----------------|-----------------------|------------------|----------------------------------------|------------------------------------------|---------------------------------------------------------|--------------------------------------------------------------------------------------------|
| Arundhathi                        | Jeyabalan      |                       | MD               | University of Pittsburgh               | Pittsburgh, PA                           | OB Co-Investigator                                      |                                                                                            |
| Krestin                           | Radonovich     |                       | PhD              | University of Pittsburgh               | Pittsburgh, PA                           | Site Neuropsychologist                                  |                                                                                            |
| Melissa                           | Sutcliffe      |                       | PhD              | University of Pittsburgh               | Pittsburgh, PA                           | Site Neuropsychologist                                  |                                                                                            |
| Susan                             | Beers          |                       | PhD              | University of Pittsburgh               | Pittsburgh, PA                           | Site Neuropsychologist                                  |                                                                                            |
| Carrie                            | Wiles          |                       | MS               | University of Pittsburgh               | Pittsburgh, PA                           | Site Neuropsychologist                                  |                                                                                            |
| Sandra                            | Alhaj          |                       | BS               | University of Pittsburgh               | Pittsburgh, PA                           | Research Assistant                                      |                                                                                            |
| Alice                             | Stek           |                       | MD               | University of Southern California      | Los Angeles, CA                          | OB Co-Investigator                                      |                                                                                            |
| Sonia                             | Perez          |                       | PhD              | University of Southern California      | Los Angeles, CA                          | Site Neuropsychologist                                  |                                                                                            |
| Rachel                            | Sierra         |                       | RC               | University of Southern California      | Los Angeles, CA                          | Research Assistant                                      |                                                                                            |
| Jeffrey                           | Tsai           |                       | MD               | University of Washington               | Seattle, WA                              | Site PI                                                 |                                                                                            |
| John W                            | Miller         |                       | MD               | University of Washington               | Seattle, WA                              | Former Site PI                                          |                                                                                            |
| Jennie                            | Mao            |                       | MD               | University of Washington               | Seattle, WA                              | OB Co-Investigator                                      |                                                                                            |
| Vaishali                          | Phatak         |                       | PhD              | University of Washington               | Seattle, WA                              | Site Neuropsychologist                                  |                                                                                            |
| Michelle                          | Kim            |                       | PhD              | University of Washington               | Seattle, WA                              | Site Neuropsychologist                                  |                                                                                            |
| Andrea                            | Cheng-Hakimian |                       | MD               | University of Washington               | Seattle, WA                              | Co-Investigator                                         |                                                                                            |
| Gina                              | DeNoble        |                       | MS               | University of Washington               | Seattle, WA                              | Research Assistant                                      |                                                                                            |
| Maria                             | Sam            |                       | MD               | Wake Forest University Health Sciences | Winston-Salem, NC                        | Site PI                                                 |                                                                                            |



Supplemental Online Content: Nonauthor Collaborators

\*Indicates required information. Only first name, last name, and suffix will appear in PubMed.

| <b>*First Name and Middle Initial(s)</b> | <b>*Last Name</b> | <b>*Suffix (eg, Jr, III)</b> | Academic Degrees | Institution                            | Location (city, state/province, country) | Role or Contribution, eg, chair, principal investigator | Group (if more than 1 Group listed in the byline) and/or Subgroup (eg, Steering Committee) |
|------------------------------------------|-------------------|------------------------------|------------------|----------------------------------------|------------------------------------------|---------------------------------------------------------|--------------------------------------------------------------------------------------------|
| Lamar                                    | Parker            |                              | MD               | Wake Forest University Health Sciences | Winston-Salem, NC                        | OB Co-Investigator                                      |                                                                                            |
| Melissa                                  | Morris            |                              | MA               | Wake Forest University Health Sciences | Winston-Salem, NC                        | Site Neuropsychologist                                  |                                                                                            |
| Jessica                                  | Dimos             |                              | BS               | Wake Forest University Health Sciences | Winston-Salem, NC                        | Research Assistant                                      |                                                                                            |
| Danielle                                 | Miller            |                              | MA               |                                        |                                          | Project Traveling Neuropsychologist                     |                                                                                            |
